# Supplementary material for: The E3 Ubiquitin Ligase Gene Sl1 Is Critical for Cadmium Tolerance in Solanum lycopersicum L.
Source: MDPI journal article supplement (doi:10.3390/antiox11030456), 2022-02-25
Supplement: s1 [file s1]

**Table S1** The primers used for qRT-PCR

| <b>Gene</b>  | <b>Accession number</b> | <b>Forward primer (5'-3')</b> | <b>Reverse primer (5'-3')</b> |
|--------------|-------------------------|-------------------------------|-------------------------------|
| <i>CAX3</i>  | Solyc09g005260          | GGAAATGCTGCTGAACATGC          | AAGGGAACCACAAACATGGC          |
| <i>HMA-A</i> | Solyc07g009130          | GTGAAGGCAAAGAAGACATG          | CTGCTCGCCAAACTTATCTA          |
| <i>HMA-B</i> | Solyc02g068490          | TTACTCGGTCTATTCGGTGT          | GCTGTAATAATGAGGCTGTC          |
| <i>IRT1</i>  | Solyc02g069200          | GCACTTGGGATAGCATTGTC          | CACCCATAAAATCAGCAGCA          |
| <i>ACTIN</i> | Solyc03g078400          | TGTCCCTATTTACGAGGGTTATGC      | CAGTTAAATCACGACCAGCAAGAT      |
| <i>SII</i>   | Solyc09g089890          | CGACGGATCGACAAC TTAC          | CCCTTCCATGTCCAAATGA           |
